# Supplementary material for: A KALA-modified lipid nanoparticle containing CpG-free plasmid DNA as a potential DNA vaccine carrier for antigen presentation and as an immune-stimulative adjuvant
Source: PubMed Central journal article supplement (PMC4330373; doi:10.1093/nar/gkv008), 2015-01-20
Supplement: supp_gkv008_nar-02786-f-2014-File010.pdf [file supp_gkv008_nar-02786-f-2014-File010.pdf]

# Figure S1

TTAATTAATAATTATCTCTAAGGCATGTGAAGTGGCTGTCTTGGTTTTTCATCTGTACTTCATCTGCTACCTCTGTGACCTGAAACATA  
TTTATAATTCCATTAAGCTGTGCATATGATAGATTTATCATATGTATTTCCCTTAAAGGATTTTTGTAAGAACTAATTGAATTGATAC  
CTGTAAAGTCTTTATCACACTACCCAATAAATAATAAATCTCTTTGTTTCAGCTCTCTGTTTCTATAAATATGTACCAGTTTTATTGTT  
TTTAGTGGTAGTGATTTTTATTCTCTTTCTATATATACACACACATGTGTGCATTTCATAAATATATACAATTTTTATGAATAAAAAAT  
TATTAGCAATCAATATTGAAAACCACTGATTTTTGTTATGTGAGCAAACAGCAGATTAAGAATTCCTGCAGGAGTCAATGGGA  
AAAACCCATTGGAGCCAAGTACACTGACTCAATAGGGACTTTCCATTGGGTTTTGCCAGTACATAAGGTCAATAGGGGGTGAG  
TCAACAGGAAAGTCCCATTGGAGCCAAGTACATTGAGTCAATAGGGACTTTCCAATGGGTTTTGCCAGTACATAAGGTCAATG  
GGAGGTAAGCCAATGGGTTTTCCATTACTGACATGTATACTGAGTCATTAGGGACTTTCCAATGGGTTTTGCCAGTACATAA  
GGTCAATAGGGGTGAATCAACAGGAAAGTCCCATTGGAGCCAAGTACACTGAGTCAATAGGGACTTTCCATTGGGTTTTGCCA  
GTACAAAAGGTCAATAGGGGGTGAAGTCAATGGGTTTTCCATTATTGGCACATACATAAGGTCAATAGGGGTGACTAGTGGAG  
AAGAGCATGCTTGAGGGCTGAGTGCCCTCAGTGGGCAGAGACACATGGCCACAGTCCCTGAGAAGTTGGGGGGAGGGGT  
GGGCAATTGAAGTGGTGCCTAGAGAAGGTGGGGCTTGGGTAAGTGGGAAAGTGTATGGTGTACTGGCTCCACCTTTTTCCC  
CAGGGTGGGGGAGAACCATATATAAGTGCAGTAGTCTCTGTGAACATTCAGCTTCTGCCTTCTCCCTCTGTGAGTTGGTAA  
GTACACTGACTGTCTATGCCTGGGAAAGGGTGGGCAGGAGGTGGGGCAGTGCAGGAAAAGTGGCACTGTGAACCTCGACGCC  
TAGACATTTGACTAACCTTCTCTCTTCTCTCTGACAGGTTGGTGTACAGTAGCTTCAAGGCCAAGATCTCAGCTGCCAT  
GGGCTCAATTGGTGCAGCATCAATGGAGTTCTGCTTTGATGTTTTCAAGGAGCTGAAAAGTGCACCATGCAATGAGAATTTTT  
TACTGCCAATAGCAATAATGTCAGCCCTTGTATGGTGTATCTGGGGCCAAGGACTCCACCAGAACCCAAATCAACAAGGTT  
GTAAAGTTTTGACAAGCTGCCAGGCTTTGGTGACTCAATAGAGGCCAGTGTGGCACCAGTGTAAATGTACACTCCTCCCTAAGG  
GATATACTGAACCAGATAACCAAGCCCAATGATGTGTACAGCTTCTCCTTGGCAAGCAGACTATATGCAGAGGAGAGGTACCCA  
ATCTTGCCTGAATACCTGCAGTGTGTCAAGGAACTTTACAGAGGGGGCCTAGAGCCCATCAACTTTTCAGACTGCAGCTGACCA  
GCAAGGGAGTTAATCAACTCTTGGGTGGAGAGCCCAATGGAATAATCAGGAATGTTCTGCAGCCTTCATCTGTAGACTCC  
CAGACAGCAATGGTCTTGGTCAATGCAATTGTCTTCAAGGGCCTGTGGGAGAAGACTTTCAAAGATGAAGACACTCAGGCAATG  
CCCTTCAGAGTAACGAACAGGAGTCCAAACCTGTGCAGATGATGTACCAAAATGGGTTATTACAGGGTGGCTCAATGGCTTCT  
GAGAAAATGAAGATTCTGGAGTTACCTTTGCCAGTGGGACAATGTCTATGCTGGTCTGTACCAGATGAGGTGTGAGGGCTT  
GAGCAGCTGGAGTCAATCAATTTTTGAGAAGTTAACAGAGTGGACCTCCTCAATGTGATGGAAGAAAGGAAAATCAAGGTC  
TACTGCCGAAATGAAAATGGAGGAGAAAATAACCTCACCTCAGTGTGATGGCAATGGGGATAACAGATGTCTTCTCCAGC  
TCTGCCAACCTCTCTGGCATCAGCAGTGTGAATCCCTAAAGATATCACAGGCTGTTTCATGCAGCCCATGCAGAAATCAATGAA  
GCAGGCAGGGAGGTGGTGGGCTCTGCTGAGGCAGGAGTGGATGCTGCCTCTGTCTCAGAAGAGTTCAGAGCAGACCACCCCT  
TCCTCTTCTGCATCAAGCATATAGCCACCAATGCTGTTCTTTCTTTGGAAGGTGTGTGTCCCCCTAAAGCTAGCTGGCCAGACA  
TGATAAGATACATTTGATGAGTTTGGACAAACCACAACCTAGAATGCAGTGAAGAAAATGCTTTATTTGTGAAATTTGTATGCTATT  
GCTTTATTTGTAACCATTAAGCTGCAATAAACAAGTTAACAACAACAATTCATTCTTTATGTTTTAGGTTTCAGGTTTCAGGGGAGGT  
GTGGGAGGTTTTTAAAGCAAGTAAAACCTCTACAATGTGGTATGGAATTCAGTCAATATGTTACCCCAAAAAAGCTGTTTTGTT  
AACTTGCCAACCTCATTCTAAAATGTATATAGAAGCCCAAAAGACAATAACAAAAATATTCTGTAGAACAATAAGGAAAGAATG  
TTCCACTAAATATCAAGATTTAGAGCAAAGCATGAGATGTGTGGGGATAGACAGTGGAGGCTGATAAATAGAGTAGAGCTCAGA  
AACAGACCCATTGATATGTAAGTGAACCTATGAAAAAATATGGCATTTACAATGGGAAAATGATGGTCTTTTTCTTTTTTAGAA  
AAACAGGGAATATATTTATATGTAAAAAATAAAGGGGAACCCATATGTCATACCATACACACAAAAAATTCAGTGAATATAA  
GTCTAAATGGAGAAGGCAAAAACCTTTAAATCTTTTAGAAAATAATATAGAAGCATGCCATCAAGACTTCAGTGTAGAGAAAAATTC  
TTATGACTCAAAGTCCTAACCACAAAGAAAAGATTGTTAATTAGATTGCATGAATTAAGACTTATTTTTAAAAATAAAAACCAT  
AAGAAAAGTCAGGCCATAGAATGACAGAAAAATTTGCAACACCCCAAGTAAAGAGAATTGTAATATGCAGATTATAAAAAAGAAGT  
CTTACAAATCAGTAAAAAATAAACTAGACAAAAATTTGAACAGATGAAAGAGAAAACCTAAATAATCATTACATGAGAAACTC  
AATCTCAGAAAATCAGAGAACTATCATTGCATATACACTAAATTTAGAGAAAATTTAAAGGCTAAGTAACATCTGTGGCTTAATTA  
ATCAGCAGTTCAACCTGTTGATAGTATGTAAGTCTCATGTTAATGTACTAAGCTCTCATGTTAATGAACTAAACCCTCATG  
GCTAATGTAAGCTCTCATGGCTAATGTAAGTCTCATGTTTCATGTACTAAGCTCTCATGTTTGAACAATAAAATTAATAT  
AAATCAGCAACTTAAATAGCCTTAAGGTTTTAAGTTTTATAAGAAAAAAGAATATAAAGGCTTTTAAAGGTTTTAAGGTTTCC  
TAGCTTTAGTCTGTTCTCAGTACAAAAATGGACAAATTTCCAGCAGGGTCTCTGAGGGCAAAATCCCTTCCCAAGGTTGTT  
CACCAATTTCTGTCATGGCTGGCCAGAGGCATCCCTGAAATTTGTGCTGACTCTTGCACATTCTGCATAAAGCTCATCTAG  
GCCTCTGACCCAGACCAAGCAAGGGTGTGTCAGGGACAACCTTGGTCTGAACTGCTGAGATGAAGAGGGTGACATCATCTC  
TGACAACACCAGCAAAATCATCTTCAACAAAGTCTCTGGAGAATCCTAATCTGTGAGTCCAGAACTCTACAGCCCTGCAACATC  
CCTTGCTGTGAGGACTGGGACTGCAGAAGTGAATTTGGCCATGATGGCCCTCTATAGTGAAGTTGATTATACTATGCAGATATA  
CTATGCCAATGTTAATTGTCAACTACTGTT

## Figure S1. Sequence data of pCpGfree-OVA(0)

The sequences of the open reading frame (OVA free from the unmethylated CpG motifs) are coloured in red.

Figure S2

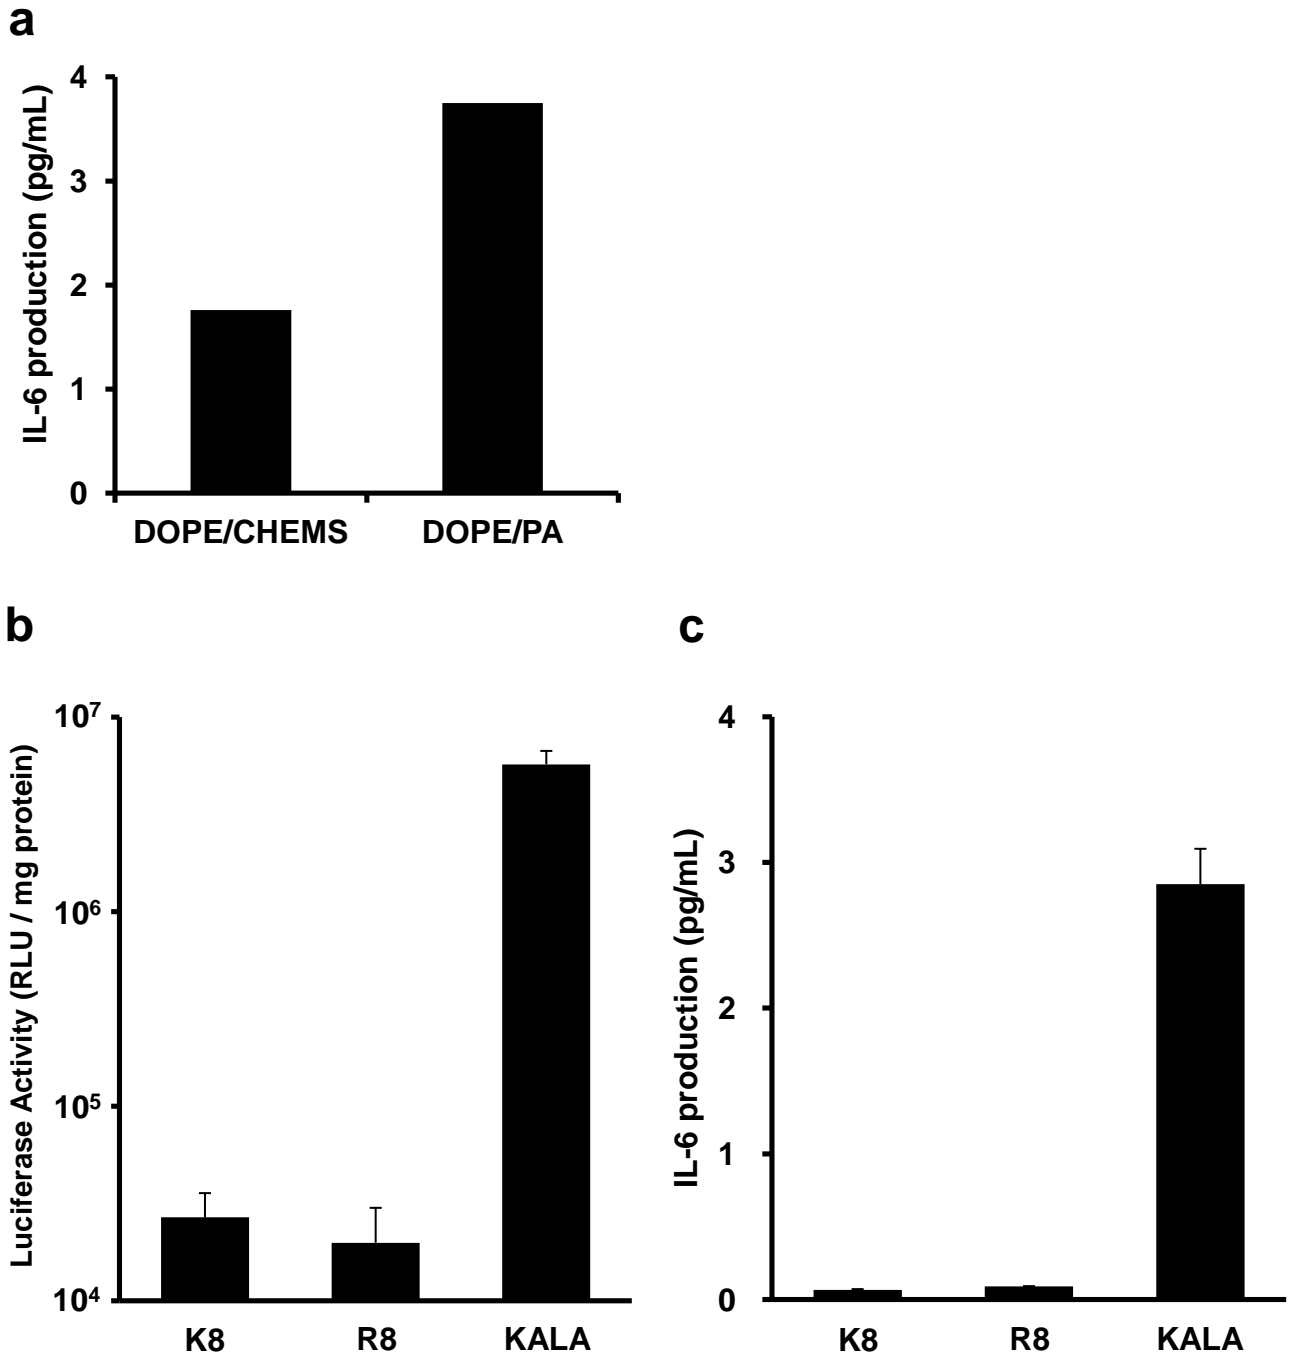

**Figure S2. Effect of anionic lipid species and surface modification on gene transfection activity and IL-6 production**

**A.** BMDCs ( $4.0 \times 10^5$  cells) were transfected with a KALA-MEND (equivalent to  $0.4 \mu\text{g}$  pDNA) composed of DOPE/CHEMS or DOPE/PA. After 6 hours, the supernatant was recovered and the concentrations of IL-6 were measured by means of ELISA. **B.C.** The MENDs that were prepared with DOPE/PA was modified with stearylated KALA, R8 and K8. The MENDs were transfected to the BMDCs ( $4.0 \times 10^5$  cells) to evaluate the transfection activities after 24 h (**B**) or IL-6 production after 6 h (**C**).

Figure S3

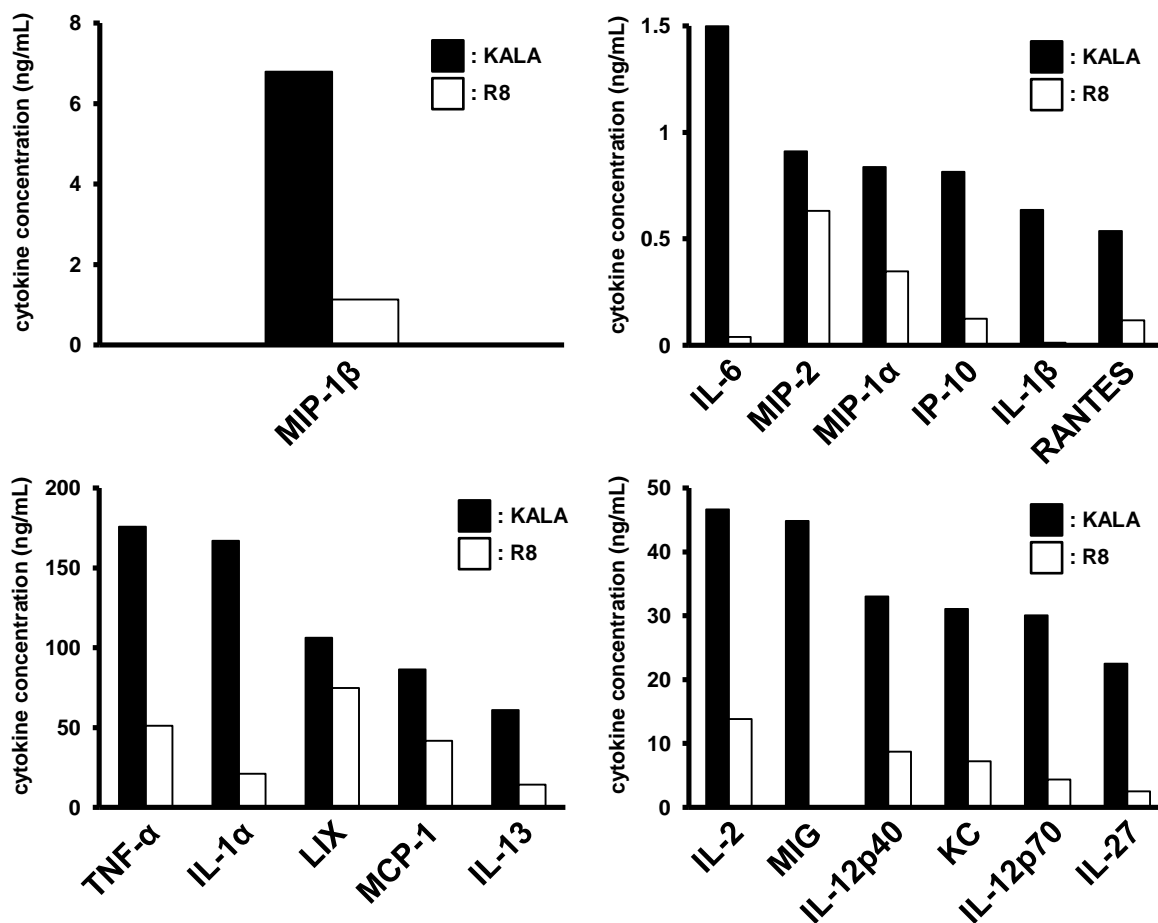

**Figure S3. Comprehensive analysis of induced cytokines and chemokines**

BMDCs ( $4.0 \times 10^5$  cells) were transfected with the KALA- or the R8-MEND (equivalent to  $0.4 \mu\text{g}$  pDNA). After 6 hours, the supernatant was recovered and the concentrations of several cytokines, chemokines and other factors were measured by means of Multiplex Suspension Array System.

Figure S4

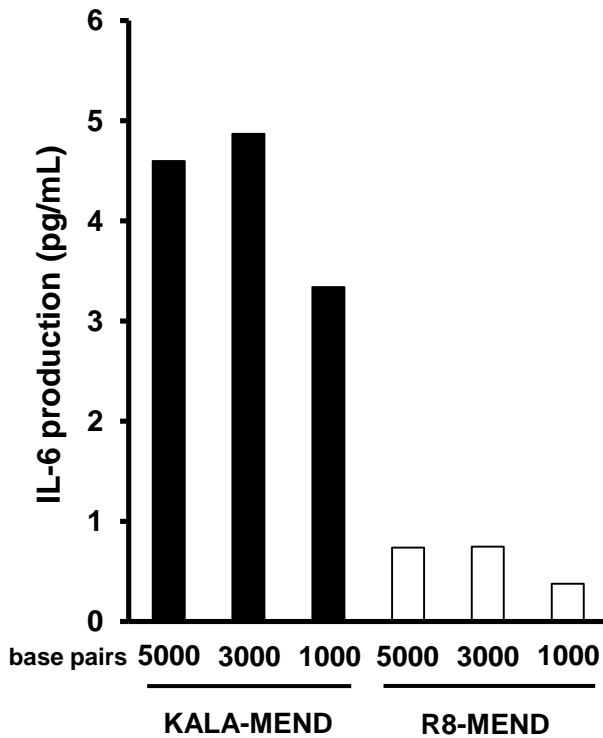

**Figure S4. Effect of the length of the encapsulated DNA for IL-6 production**

BMDCs ( $4.0 \times 10^5$  cells) were transfected with the KALA- or the R8-MEND (equivalent to 0.4  $\mu$ g pDNA) encapsulating several types of DNA (approximately 1000, 3000 and 5000 base pairs). After 6 hours, the supernatant was recovered and the concentrations of IL-6 were measured by means of ELISA.

Figure S5

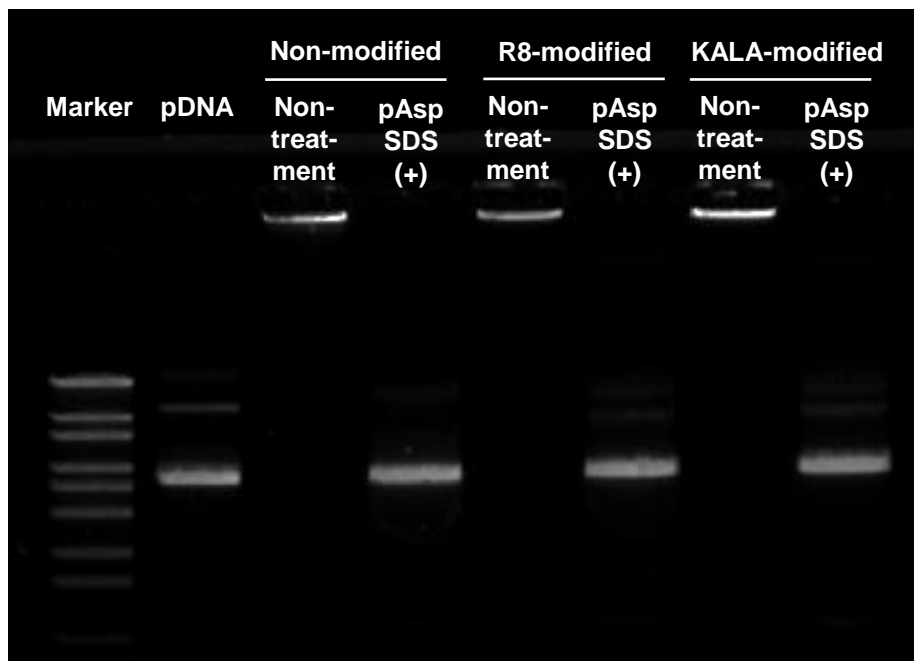

**Figure S5. Association of pDNA with particle after the preparation.**

The association of the pDNA with MENDs (non-modified, R8-modified and KALA-modified MEND) were evaluated by analysing the migration of pDNA through 1% agarose gel. The MENDs with or without SDS (1 % w/v) and poly-aspartic acid (pAsp, 1 mg/mL) was subject to gel electrophoresis, followed by staining with Gel Red<sup>TM</sup> (Biotium Inc., Hayward, CA, USA)

Figure S6

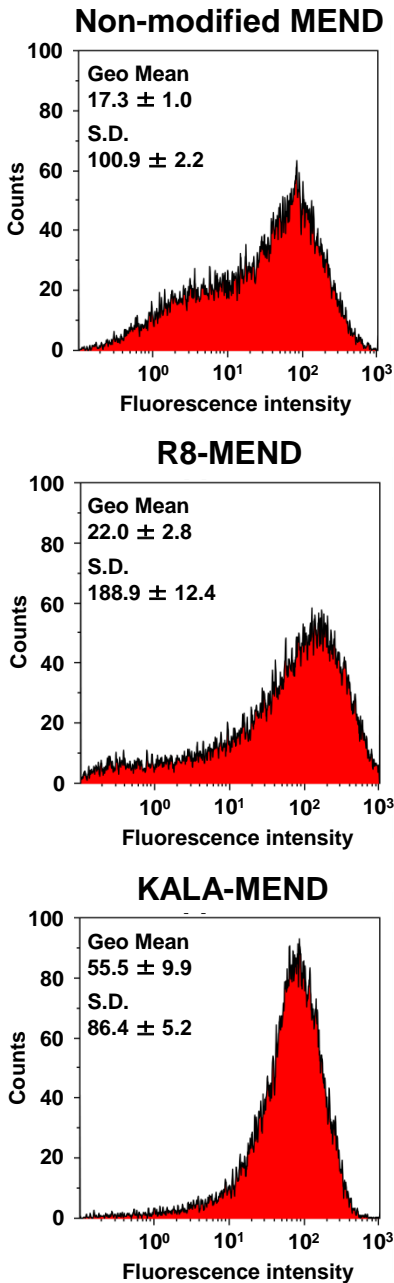

**Figure S6. Cellular uptake of MENDs to BMDCs**

For the analysis of the cellular uptake of non-modified MEND, R8-MEND and KALA-MEND, the particles were fluorescently labelled by adding the 0.02 mol% of DiO in the lipid composition. The BMDCs ( $1 \times 10^6$  cells) were incubated with the DiD-labeled MENDs (equivalent to  $0.2 \mu\text{g}$  pDNA) for 1 hour. The cells were washed twice with ice-cold PBS. The cell suspension in the FACS buffer was filtered through a nylon mesh ( $45 \mu\text{m}$  mesh size) to remove cell aggregates, and then analyzed using a Gallios flow cytometer (Beckman Coulter, Inc., Brea, CA, USA).

Figure S7

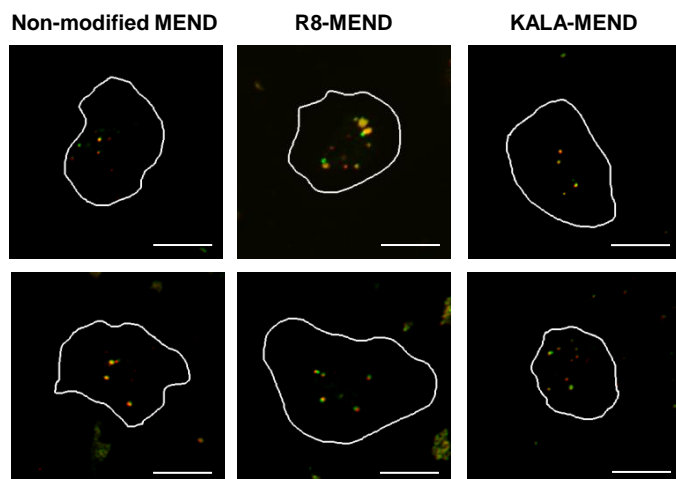

**Figure S7. Visualization of the intracellular release of the pDNA from the MENDs by confocal microscopy**

To evaluate the release of pDNA from the MENDs, BMDCs ( $4 \times 10^5$  cells) were incubated with DiO-labeled MENDs encapsulating QD705- pDNA (equivalent to  $0.4 \mu\text{g}$  (KALA-MEND) or  $1.2 \mu\text{g}$  (Non-modified MEND and R8-MEND) pDNA) on a glass base dish (Iwaki, Osaka, Japan) for 6 hrs in 1 ml of culture medium. After washing the cells 3 times with 1 ml portions of PBS, the culture medium was changed to HBSS and microscopic observations were performed. Confocal images were obtained using a Nikon ECLIPSE TE-2000-U equipped a spinning disk confocal unit, CSU-X1 and a Nikon Plan Apo  $100\times/1.40$  oil immersion objective. The signals derived from QD705 and DiO are pseudocolored in red and green, respectively. Bars =  $20 \mu\text{m}$ .
